# Supplementary material for: Iron Administration Overcomes Resistance to Erastin-Mediated Ferroptosis in Ovarian Cancer Cells
Source: Frontiers journal article supplement (doi:10.3389/fonc.2022.868351), 2022-03-31
Supplement: Data_Sheet_1.PDF [file Data_Sheet_1.PDF]

## Supplementary Material

### Iron administration overcomes resistance to erastin-mediated ferroptosis in ovarian cancer cells

Battaglia AM et al.

#### Supplementary Figure 1

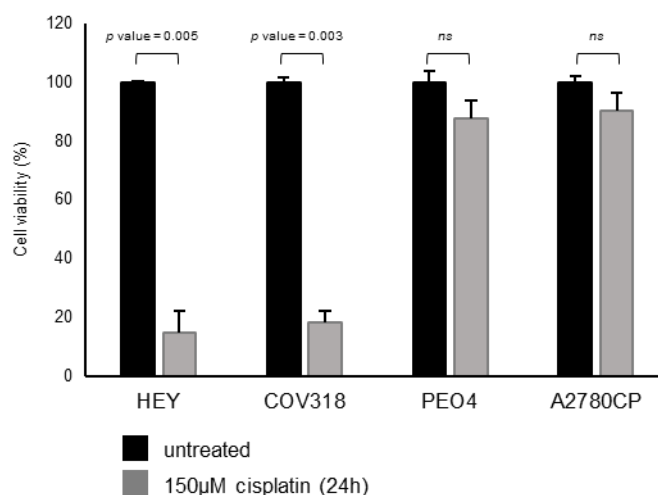

**Supplementary Figure 1.** Cell viability analysis of HEY, COV318, PEO4 and A2780CP OVCA cells upon treatment with 150μM cisplatin for 24h. Results are shown as means  $\pm$  SD of three independent experiments.  $p$  value  $< 0.05$  was considered as statistically significant. ns: not significant.

**Supplementary Figure 2**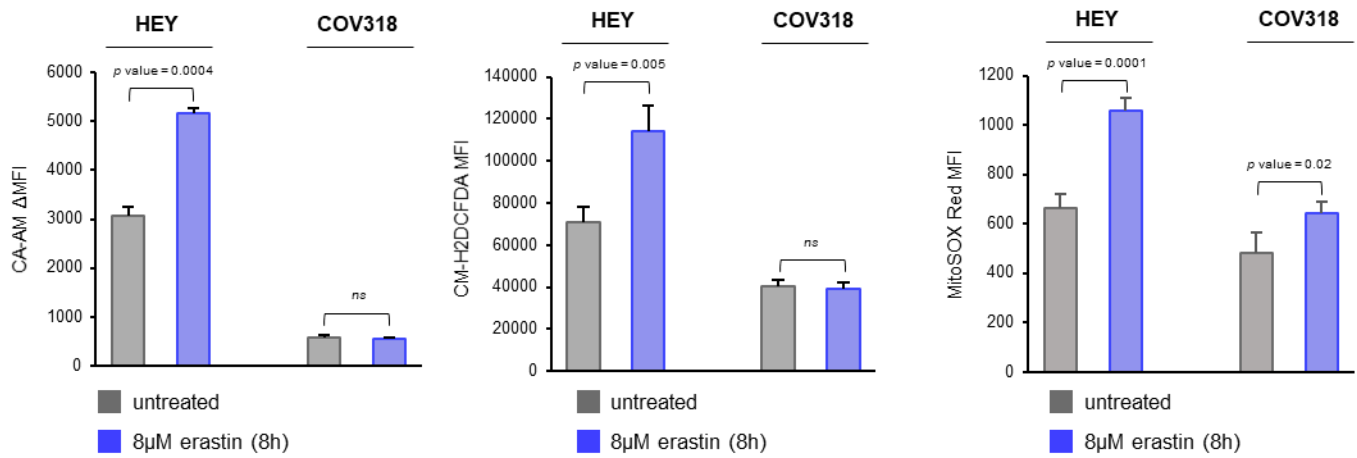

**Supplementary Figure 2.** Relative histograms of flow cytometry analysis of ROS production by using CA-AM, CM-H2DCFDA and MitoSOX Red assays in HEY and COV318 cells untreated and treated with 8μM erastin for 8h. Results are shown as means ± SD of three independent experiments. *p* value < 0.05 was considered as statistically significant. ns: not significant.

## Supplementary Figure 3

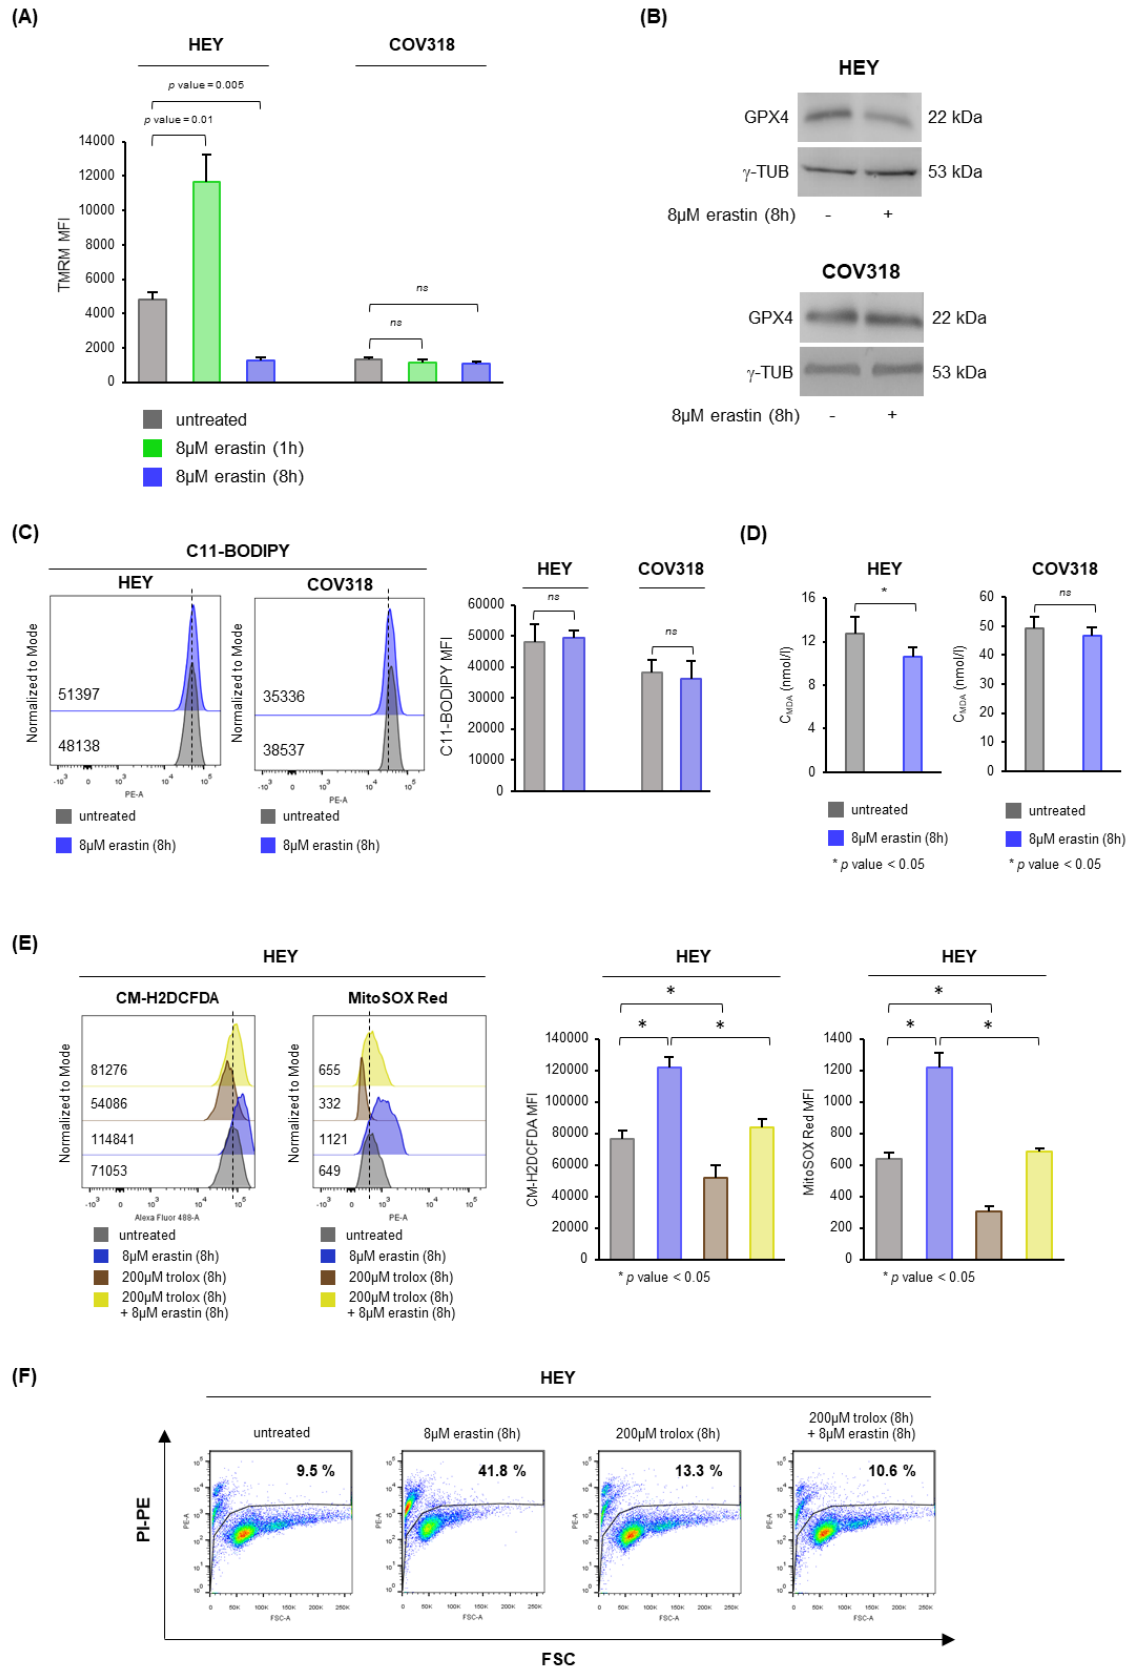

**Supplementary Figure 3.** (A) Relative histograms of flow cytometry analysis of mitochondrial membrane potential by using TMRM assay in HEY and COV318 cells untreated and treated with 8 $\mu$ M erastin for 1 and 8h. (B) Western Blot of GPX4 in HEY and COV318 cells upon administration of 8 $\mu$ M erastin for 8h.  $\gamma$ -TUB was used as a normalization control for protein quantification. Analysis of lipid peroxidation by both flow cytometry using C11-BODIPY (C) and MDA assay (D) in HEY and COV318 cells untreated or treated with 8 $\mu$ M erastin for 8h. (E) Analysis of cytosolic and mitochondrial ROS production by CM-H2DCFDA and MitoSOX Red fluorescence assays and relative histograms, in HEY cells untreated, treated with 8 $\mu$ M erastin (8h) and 200 $\mu$ M trolox (8h) alone, and in combination. (F) Cell mortality determined using PI cytofluorimetric assay in HEY cells untreated, treated with erastin and trolox alone, and in combination. All data are presented as mean  $\pm$  SD from three independent experiments.  $p$  value  $< 0.05$  was considered as statistically significant. ns: not significant.

## Supplementary Figure 4

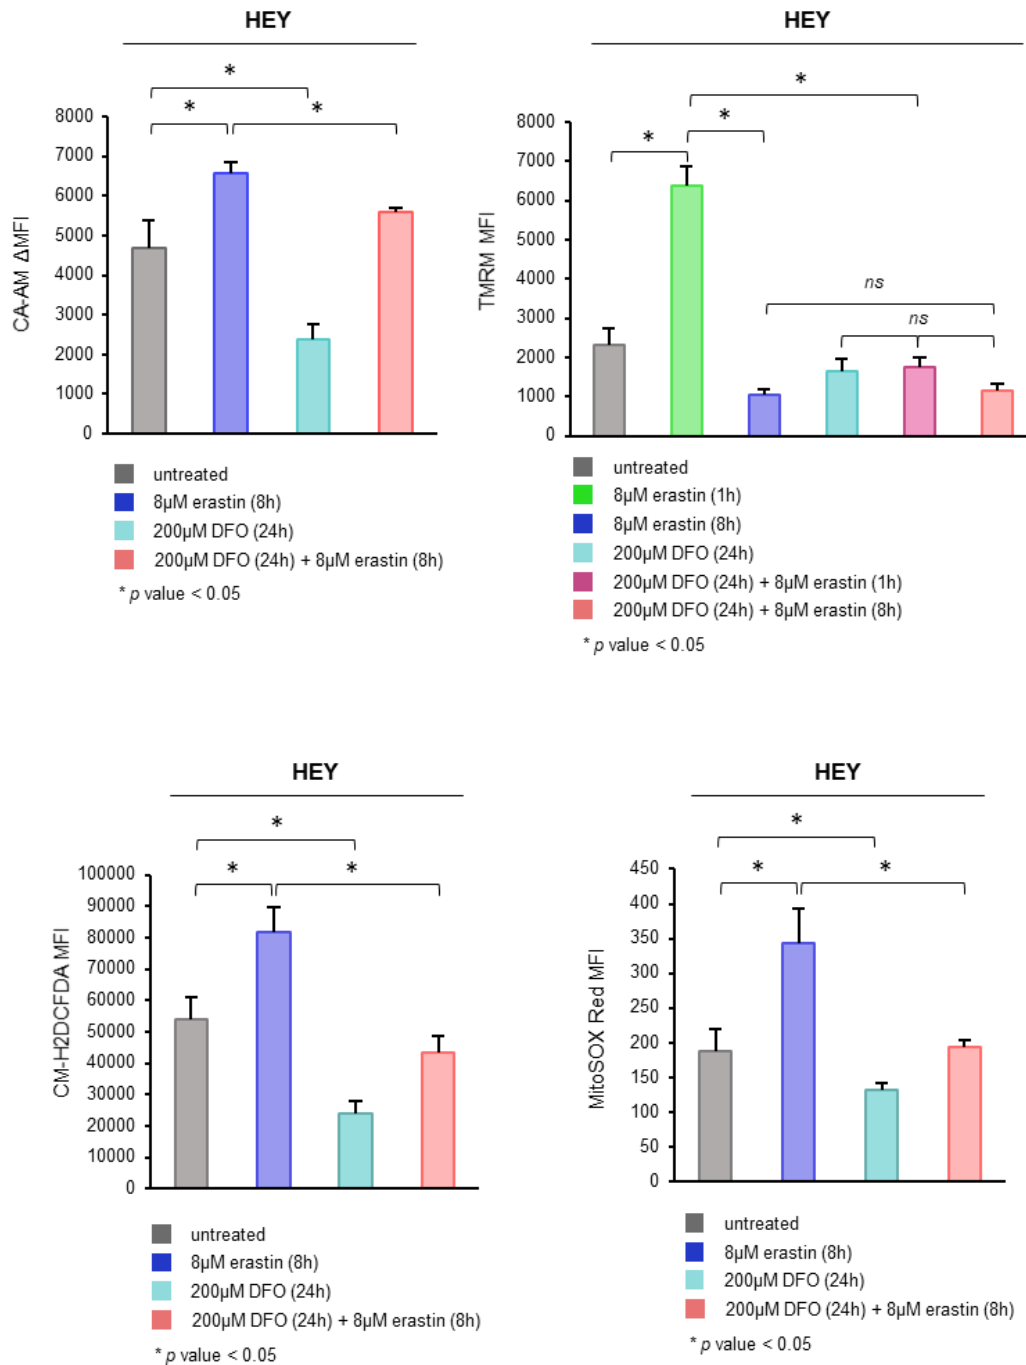

**Supplementary Figure 4.** Relative histograms of flow cytometry analysis of LIP level, mitochondrial membrane potential, cytosolic and mitochondrial ROS production by using CA-AM, TMRM, CM-H2DCFDA and MitoSOX Red assays in HEY cells untreated, treated with 8μM erastin (8h) and 200μM DFO (24h) alone, and in combination. Results are shown as means ± SD of three independent experiments.  $p$  value < 0.05 was considered as statistically significant. ns: not significant.

Supplementary Figure 5

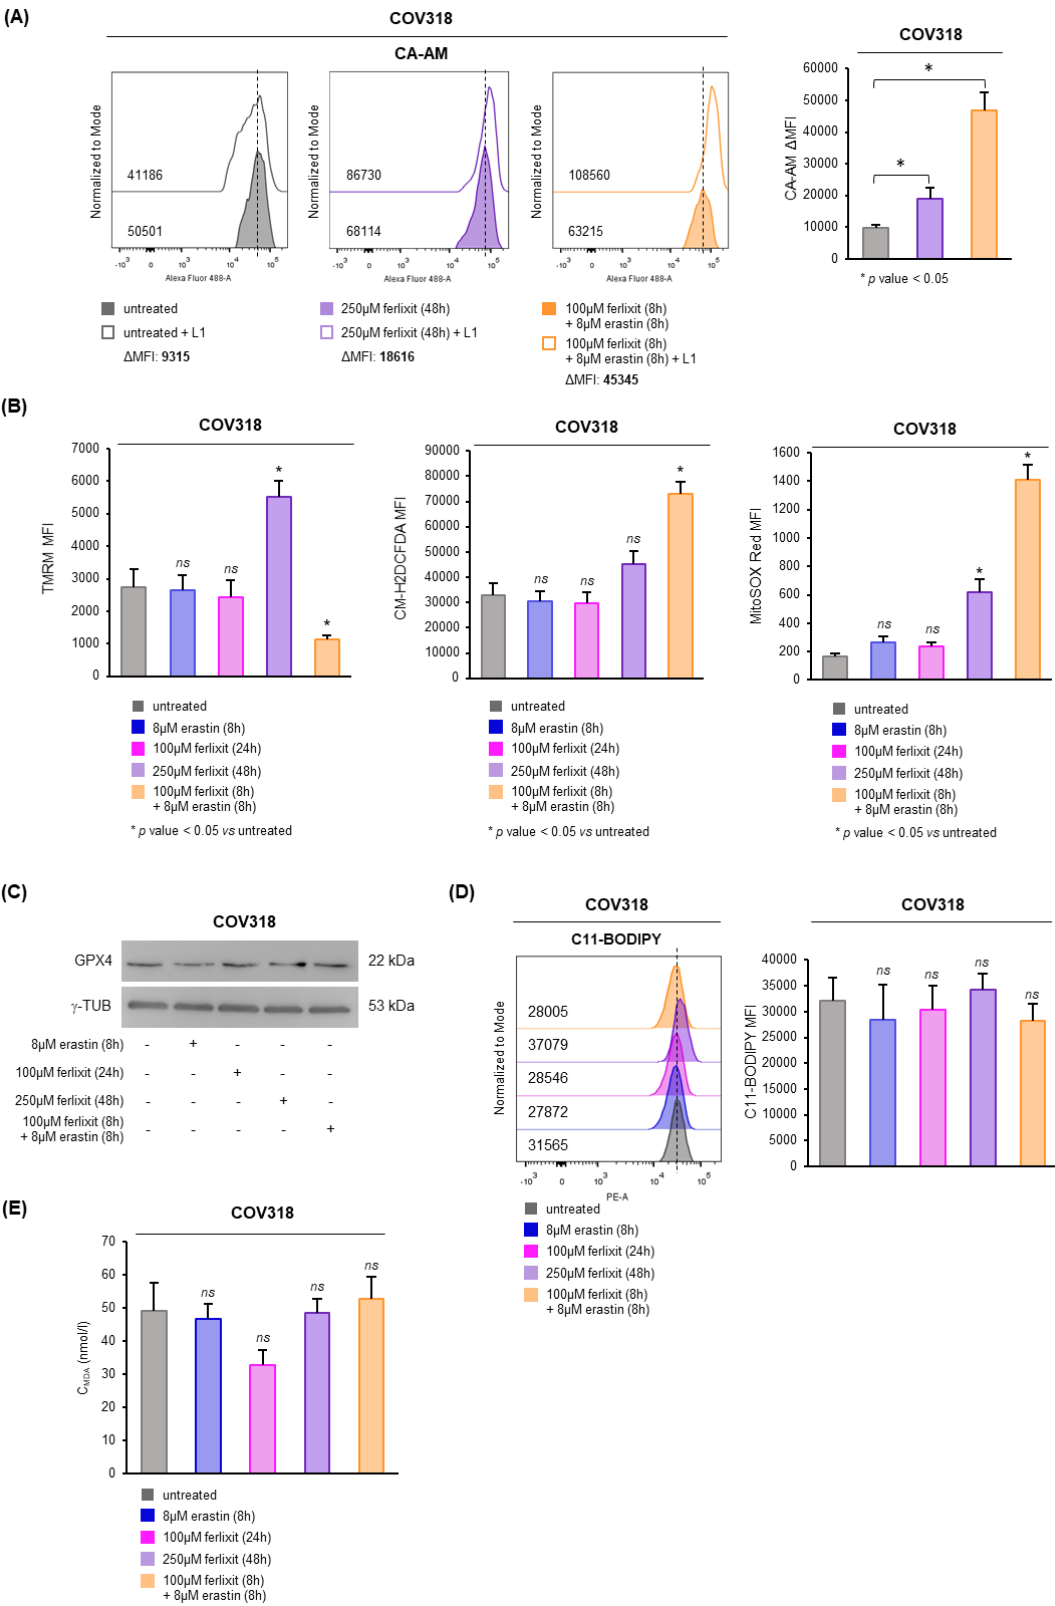

**Supplementary Figure 5.** (A) LIP level assessed by flow cytometry using CA-AM and relative histogram, in COV318 cells upon treatment with ferlixit and erastin alone, and in combination. (B) Relative histograms of flow cytometry analysis of mitochondrial membrane potential, cytosolic and mitochondrial ROS production by using TMRM, CM-H2DCFDA and MitoSOX Red assays in COV318 cells untreated and treated with ferlixit and erastin alone, and in combination. (C) Western Blot of GPX4 in COV318 cells upon administration of ferlixit and erastin alone, and in combination.  $\gamma$ -TUB was used as a normalization control for protein quantification. Analysis of lipid peroxidation by both flow cytometry using C11-BODIPY (D) and MDA assay (E) in COV318 cells untreated, treated with ferlixit and erastin alone, and in combination. All data are presented as mean  $\pm$  SD from three independent experiments.  $p$  value  $< 0.05$  was considered as statistically significant. ns: not significant.

## Supplementary Figure 6

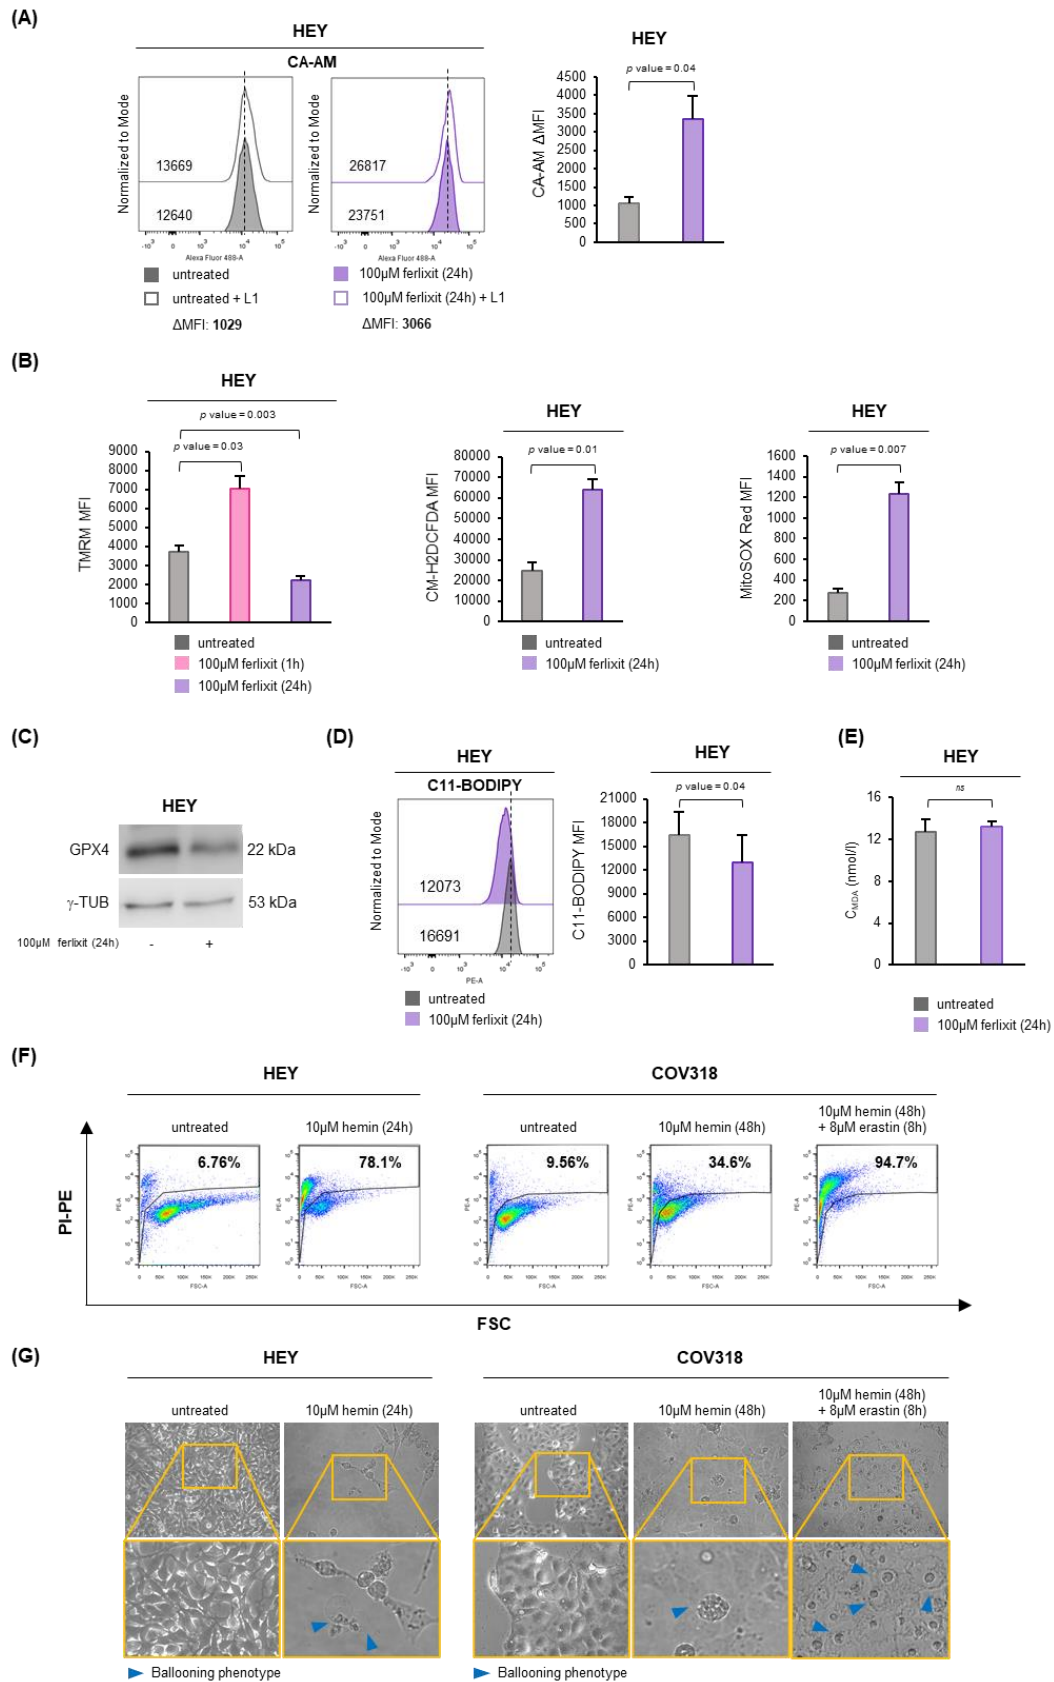



**Supplementary Figure 6.** (A) LIP level assessed by flow cytometry using CA-AM and relative histogram, in HEY cells upon administration of 100 $\mu$ M ferlixit for 24h. (B) Relative histograms of flow cytometry analysis of mitochondrial membrane potential, cytosolic and mitochondrial ROS production by using TMRM, CM-H2DCFDA and MitoSOX Red assays in HEY cells untreated and treated with ferlixit. (C) Western Blot of GPX4 in HEY cells upon administration of 100 $\mu$ M ferlixit for 24h.  $\gamma$ -TUB was used as a normalization control for protein quantification. Analysis of lipid peroxidation by both flow cytometry using C11-BODIPY (D) and MDA assay (E) in HEY cells untreated or treated with 100 $\mu$ M ferlixit for 24h. (F) Cell mortality determined using PI cytofluorimetric assay in HEY and COV318 cells untreated, treated with 10 $\mu$ M hemin alone and/or co-treated with ferlixit. (H) Optical microscopy images showing the presence or absence of the ballooning phenotype in HEY and COV318 cells untreated, treated with 10 $\mu$ M hemin alone and/or co-treated with ferlixit. All data are presented as mean  $\pm$  SD from three independent experiments.  $p$  value  $< 0.05$  was considered as statistically significant. ns: not significant.

### Supplementary Figure 7

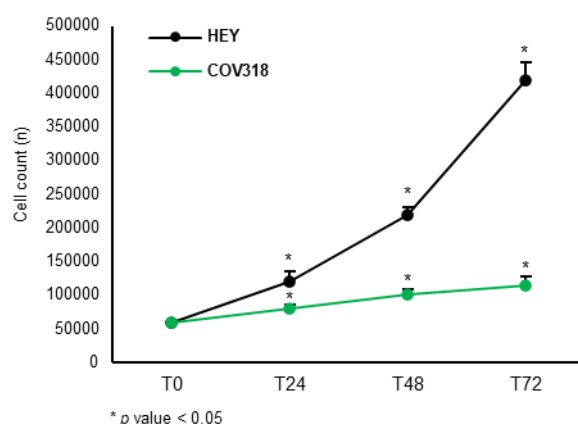

**Supplementary Figure 7.** Growth rate analysis of HEY and COV318 cells by using Trypan Blue assay. Results are shown as means  $\pm$  SD of three independent experiments.  $p$  value  $< 0.05$  was considered as statistically significant. ns: not significant.

## Supplementary Figure 8

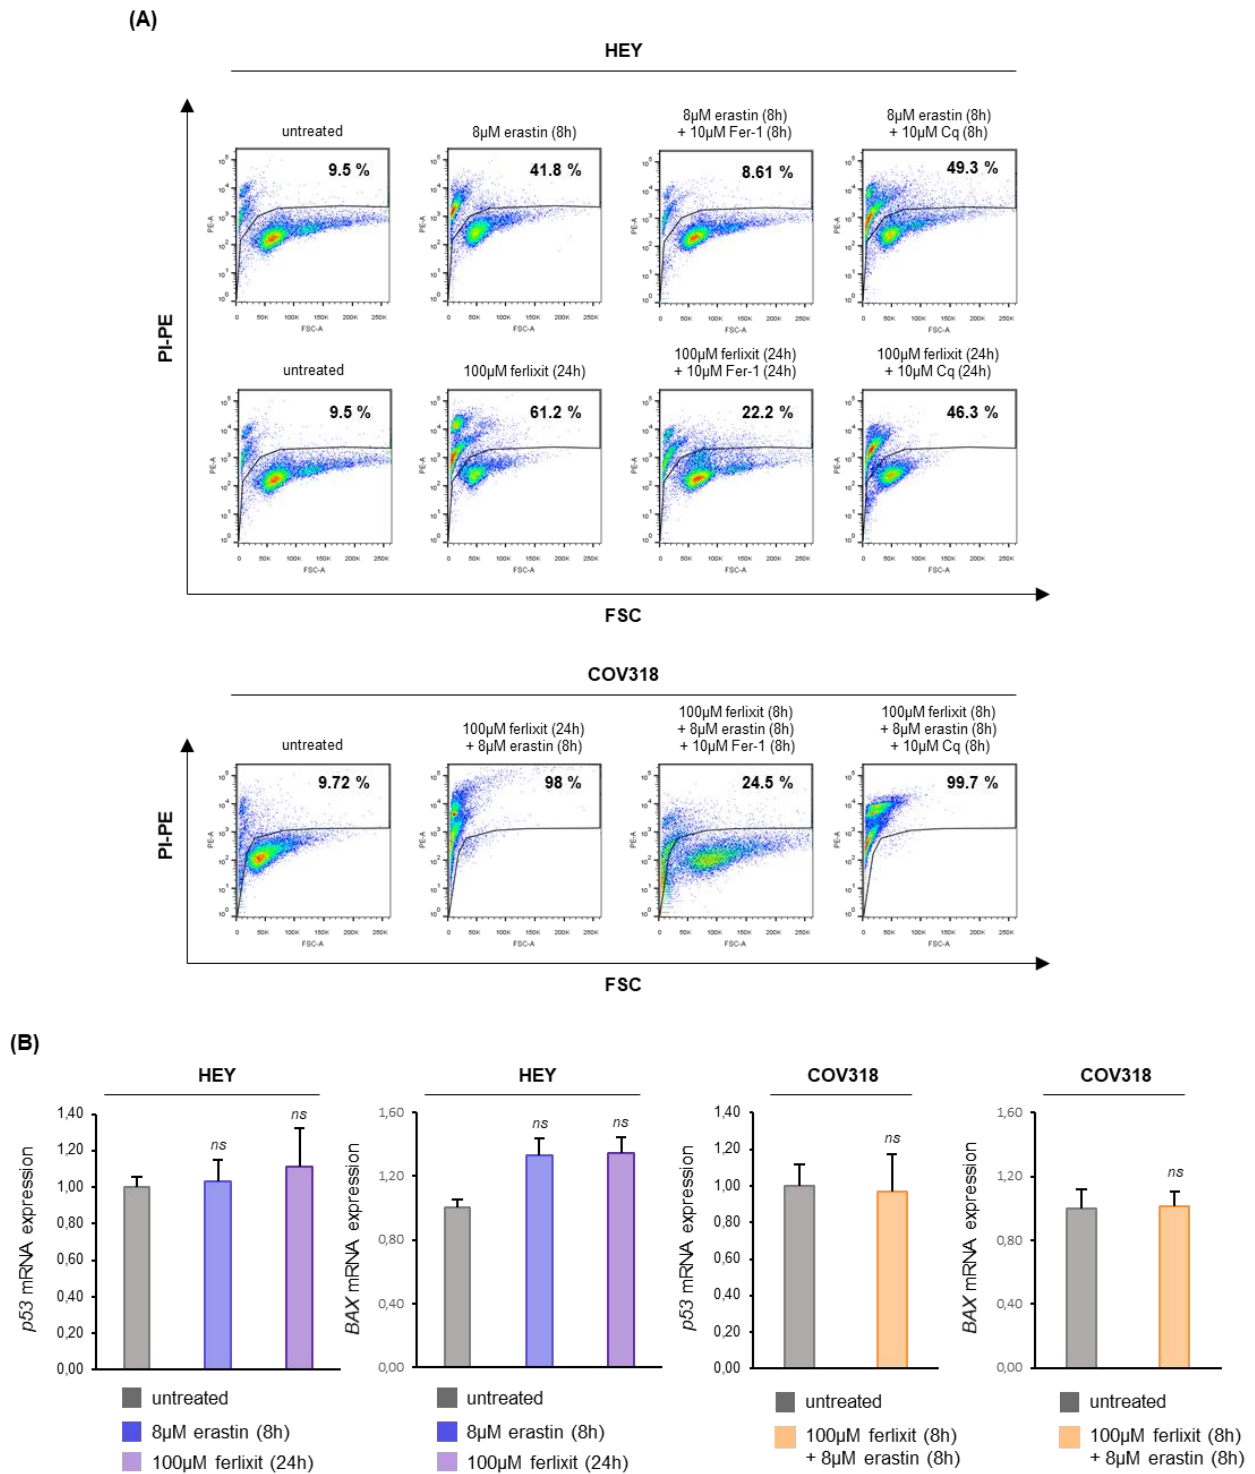

**Supplementary Figure 8.** (A) Cell mortality determined using PI cytofluorimetric assay in HEY and COV318 cells untreated, treated with erastin and/or ferlixit and co-treated with 10 $\mu$ M Fer-1 and/or 10 $\mu$ M Cq. (B) *p53* and *BAX* mRNA levels in HEY and COV318 cells untreated and treated with erastin and/or ferlixit. All data are presented as mean  $\pm$  SD from three independent experiments. *p* value < 0.05 was considered as statistically significant. ns: not significant.
